# Supplementary material for: Identification of salt gland-associated genes and characterization of a dehydrin from the salt secretor mangrove Avicennia officinalis
Source: PubMed Central journal article supplement (PMC4247641; doi:10.1186/s12870-014-0291-6), 2014-11-18
Supplement: 12870_2014_291_MOESM3_ESM.pdf [file 12870_2014_291_MOESM3_ESM.pdf]

| Sl. No. | Gene Abbreviation | Forward primer sequence 5'-3' | Reverse primer sequence 5'-3' |
|---------|-------------------|-------------------------------|-------------------------------|
| 1       | <b>MR</b>         | GAGGCCGAATTGAGACCACA          | GCAGCCGTTTTGTTGGGAAT          |
| 2       | <b>LR</b>         | GGGACCGTCAAGAGTTTGT           | GCTGCCCCATCATAGCTGTT          |
| 3       | <b>ST</b>         | TCTGCAATGCCCTGTCTTGA          | TGGCATCTATACTGGCAGCAA         |
| 4       | <b>SA</b>         | CGTTCAAGGTCTCGCTCAGT          | CTTTTGCTTGCACTGCGTCT          |
| 5       | <b>T</b>          | GGTAGTAGCCTGCAACCCAG          | CCATTAGGTGGCCAGCTCTC          |
| 6       | <b>AD</b>         | TCAACGTCAGCGAGAAGCTC          | GCAGGCAATCCAGCATTTCA          |
| 7       | <b>ACL</b>        | AGGAACCATGGCTCTCATCAA         | ACAAATGCAGCAACTCCAGC          |
| 8       | <b>PD</b>         | GCCTAATTTCACTGGGGCTG          | TCCACACCTTGCTTTCTCCA          |
| 9       | <b>SIP</b>        | CAGCAACGGATGGCTGAATG          | CTTGGCATCGGTGCAGTAGT          |
| 10      | <b>TPS</b>        | CTGTGCTGGTGCAGATCGTA          | GGCTTCCAAGCTCCTCATT           |
| 11      | <b>ACC</b>        | GCTTGAAGCTGTTCAGTCCG          | AGTTTCTCCAAGTGGCCTGC          |
| 12      | <b>PS</b>         | TGCTGGAGCCGATTACTGTG          | GTGTCTAGCTGCCAAGACCT          |
| 13      | <b>AF2</b>        | TGCGGTGACCAATCTACCAC          | CCTTCGTCATATCCCCAGC           |
| 14      | <b>HBP</b>        | GGGGGCCGTTGATCTTTTTTC         | TCAACAGGAACTCAGCACGA          |
| 15      | <b>AP2</b>        | CCCCCTGTCCAACAAGAGTC          | GGCGAGGAGTTCAAAGGCTA          |
| 16      | <b>RP</b>         | CTCAGTGGCACATGGAACCT          | TGGATCAATCCGCCTCAACG          |
| 17      | <b>DR</b>         | TGTCTGCCGAAAGATGGTT           | ATCCTTTCAAGGGAGTGGAGA         |
| 18      | <b>CK2</b>        | ACTGGGGACTTGCTGAGTTT          | TCCAGCAAACATACAGCCCA          |
| 19      | <b>XCP2</b>       | GAAATCCGGCCTCTGTGGAA          | AGACATTAGGCGGTGCAACA          |
| 20      | <b>GS</b>         | GCCACGACCTCCTTTGAAGA          | AGCACGCTCAAATACCGTCA          |
| 21      | <b>KCS</b>        | CAGAAGCCAAAGGCAGGGTA          | CTTGCACTCTTGAGCTGGGA          |
| 22      | <b>PTF</b>        | GCTGCAATGGAAGTGTGGTT          | TCCTGCCTGAACGAGAAACG          |
| 23      | <b>UC2</b>        | ACCCTGCACCAACAAGACTC          | GGGTCTTGCTGCAACCTCTT          |
| 24      | <b>AQP</b>        | GCTTCCCTGACCAGGGCTC           | GCCCCTCCTTTAAGCCTCTG          |
| 25      | <b>PRS</b>        | CGCCGATGAGTGTGGAAAC           | AAGAATCGCACATCCAGGCT          |
| 26      | <b>CCO</b>        | GAGTCGAGGGTGTAAATGCCG         | TCCAAAGGGACCAGATGGGT          |
| 27      | <b>TR</b>         | ATTCTAAGCGCCGAGACTGG          | AGAGGAGGACTAACAGCCCA          |
| 28      | <b>DHN</b>        | GACACCACTGGAGCGT              | TCCGTAGTTCCGTACC              |
| 29      | <b>NAC</b>        | TCGACGCATCTGACTCGTTT          | GCTCACTCCACTTGGGTTCA          |
| 30      | <b>R2R3</b>       | TCTCAGATACGGCCACTGGA          | TTCCCTCGTTTCACACCTGG          |
| 31      | <b>ZF2</b>        | GATTTTCGCAGGGGTGCTTG          | TGCCATCTTTGCACAGCCTA          |
| 32      | <b>ABC</b>        | GGTCACTCTCAGCAACGGAA          | GTCGTCCAGAAAGGGCATCA          |
| 33      | <b>VATD</b>       | TGCGGCACTTAAGTTTCGAT          | GCAAGCTTGAACCTGCTGAC          |
| 34      | <b>HATPase</b>    | CAAAGAACTCTCCACGGGCT          | CTTGCCATTTTCAGCTCGACG         |
