# Supplementary material for: Identification of salt gland-associated genes and characterization of a dehydrin from the salt secretor mangrove Avicennia officinalis
Source: PubMed Central journal article supplement (PMC4247641; doi:10.1186/s12870-014-0291-6), 2014-11-18

**A)**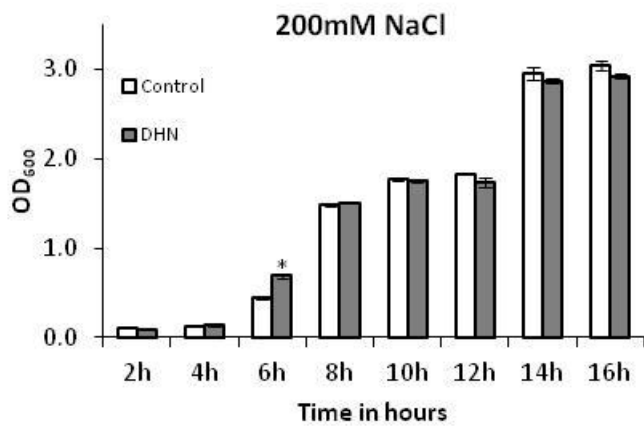**B)**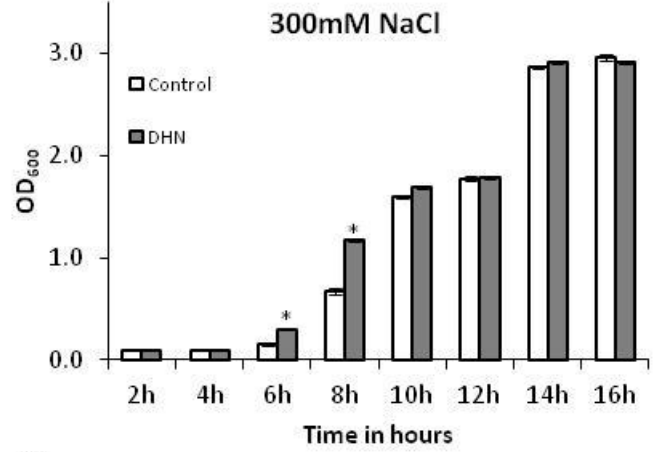**C)**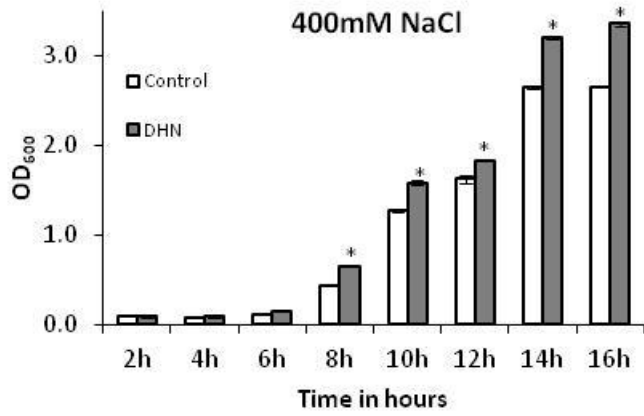**D)**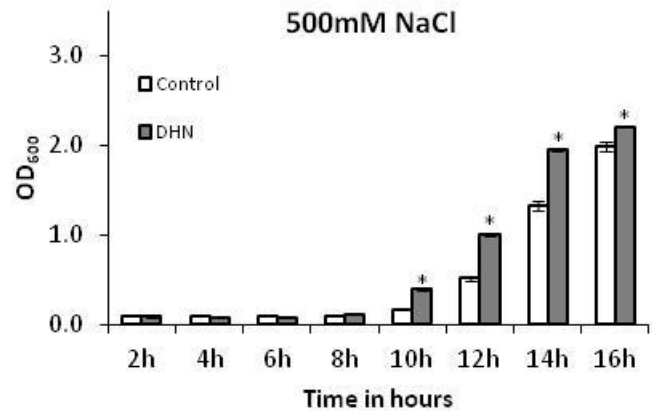

Supplement: 12870_2014_291_MOESM4_ESM.pdf [file 12870_2014_291_MOESM4_ESM.pdf]
